# Supplementary material
Source: publisher site journal article supplement (https://www.dovepress.com/article/409232)
Supplement: Supplementary file 1 [file get_supplementary_file.php]

A

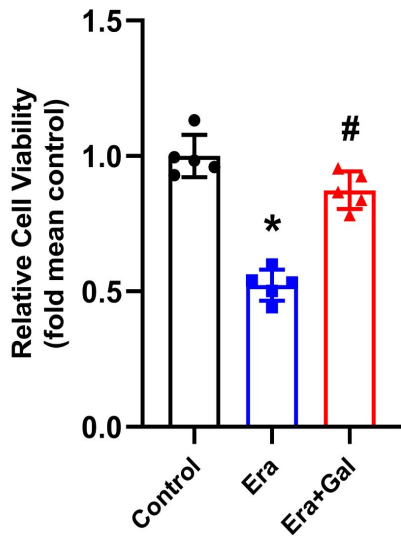

B

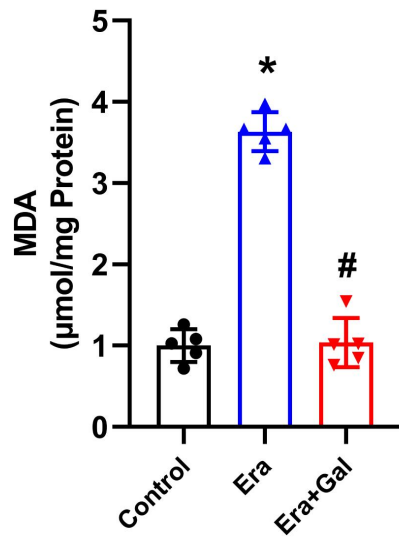

C

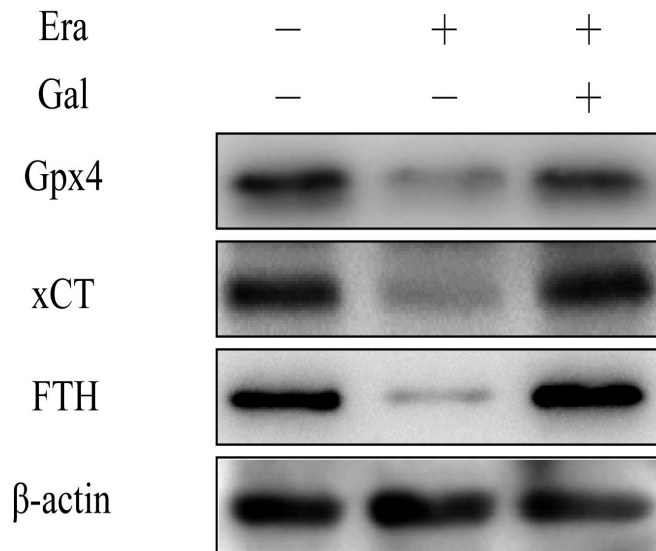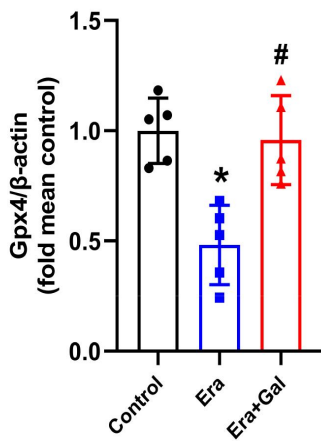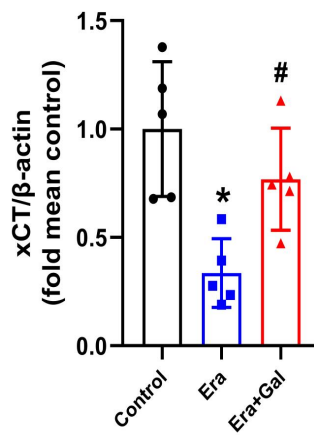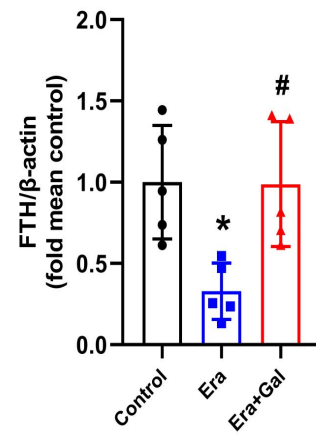

**Supplementary Figure S1.** Gal alleviated ferroptosis stimulator erastin (Era) induced ferroptosis in NRCs. (A) Gal at 25  $\mu\text{M}$  was added into NRCs for 24 h. Then, 10  $\mu\text{M}$  of Era was added into NRCs for 12 h. Cell vitality in different groups was determined with CCK-8 assay. Summary data are presented as means  $\pm$  SD;  $n = 5$ .  $*P < 0.05$  vs. control group,  $^{\#}P < 0.05$  vs. Era group. (B) MDA levels in NRCs in different groups. Summary data are presented as means  $\pm$  SD;  $n = 5$ .  $*P < 0.05$  vs. control group,  $^{\#}P < 0.05$  vs. Era group. (C) Representative pictures of Western Blot and quantitative analysis of Gpx4, xCT, and FTH in different groups. Summary data are presented as means  $\pm$  SD;  $n = 5$ .  $*P < 0.05$  vs. Control group,  $^{\#}P < 0.05$  vs. Era group. NRCs, neonatal rat cardiomyocytes; MDA, malondialdehyde; SD, standard deviation; CCK-8, Cell Counting Kit-8.
